# Supplementary material
Source: PubMed Central journal article supplement (PMC4027989)
Supplement: Supp_Figure1.pdf [file Supp_Figure1.pdf]

## Supplementary Data

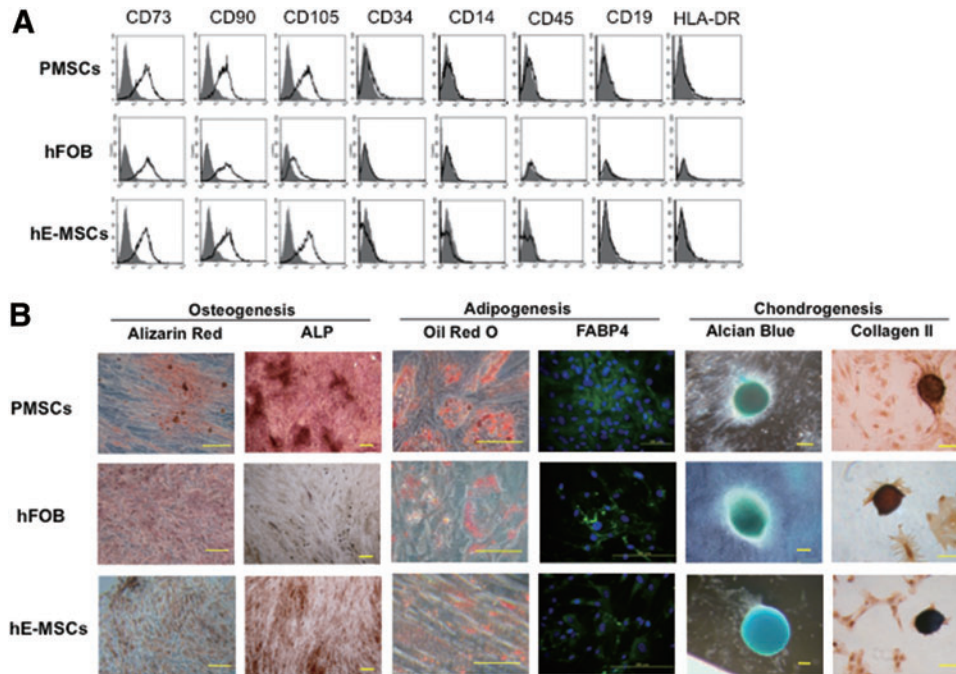

**SUPPLEMENTARY FIG. S1.** Characterization of developmentally early stage mesenchymal stem cells (hDE-MSCs). (A) Surface marker profile, and (B) tri-lineage mesodermal differentiation capacity of human embryonic stem cell-derived MSCs (hE-MSCs), fetal bone-derived MSCs the hFOB 1.19 cell line (hFOB), and term placenta MSCs (PMSCs). Osteogenic, adipogenic, and chondrogenic differentiation was characterized by staining with special stains and markers specific to each lineage: Alizarin Red (for calcium deposition) and alkaline phosphatase; Oil Red O (for oil droplet formation) and *FABP4*; and Alcian Blue (for glycosaminoglycans formation) and collagen II; respectively. Scale bar, 200  $\mu$ m.
