# Supplementary material
Source: PubMed Central journal article supplement (PMC4027989)
Supplement: Supp_Figure2.pdf [file Supp_Figure2.pdf]

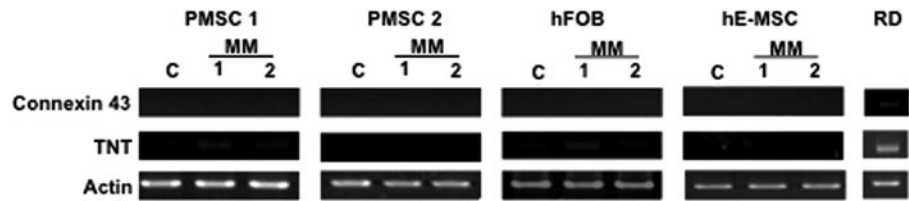

**SUPPLEMENTARY FIG. S2.** Expression of cardiac genes hDE-MSCs after standard myogenic-differentiation medium. PMSCs (two donors), hFOB, and hE-MSCs were cultured in MM1 (medium with 2% horse serum) or MM2 (MM1 with 5  $\mu$ M of 5-azacytadine) for 3–7 days and assayed for expression of the cardiac genes *connexin 43* and troponin T (*TNT*). C, control/expansion medium. The human rhabdomyosarcoma cell line RD was used as a positive control.
