# Supplementary material
Source: PubMed Central journal article supplement (PMC4027989)
Supplement: Supp_Figure3.pdf [file Supp_Figure3.pdf]

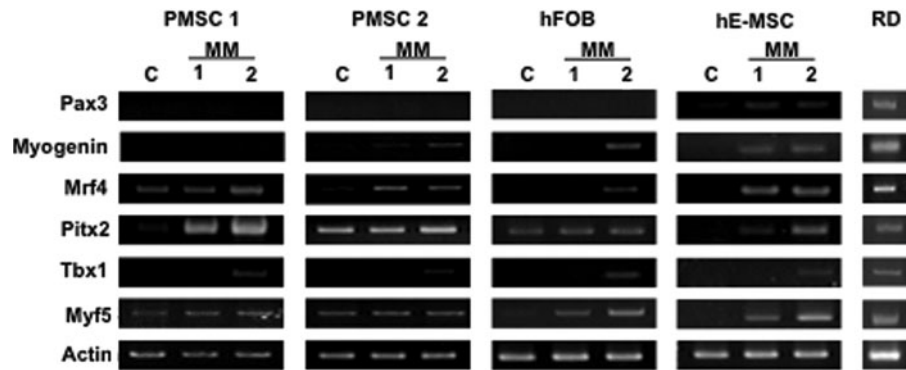

**SUPPLEMENTARY FIG. S3.** Expression of skeletal muscle (SkM)-associated genes by hDE-MSCs after standard myogenic-differentiation medium. Expression levels of SkM-associated genes in various sources of hDE-MSCs (two donors of PMSCs; hFOB, and hE-MSCs) after 3–7 days of induction in C, MM1, or MM2 medium as assayed by reverse transcription–polymerase chain reaction (RT-PCR). RD, human rhabdomyosarcoma cell line (positive control).
