# Supplementary material
Source: PubMed Central journal article supplement (PMC4027989)
Supplement: Supp_Figure4.pdf [file Supp_Figure4.pdf]

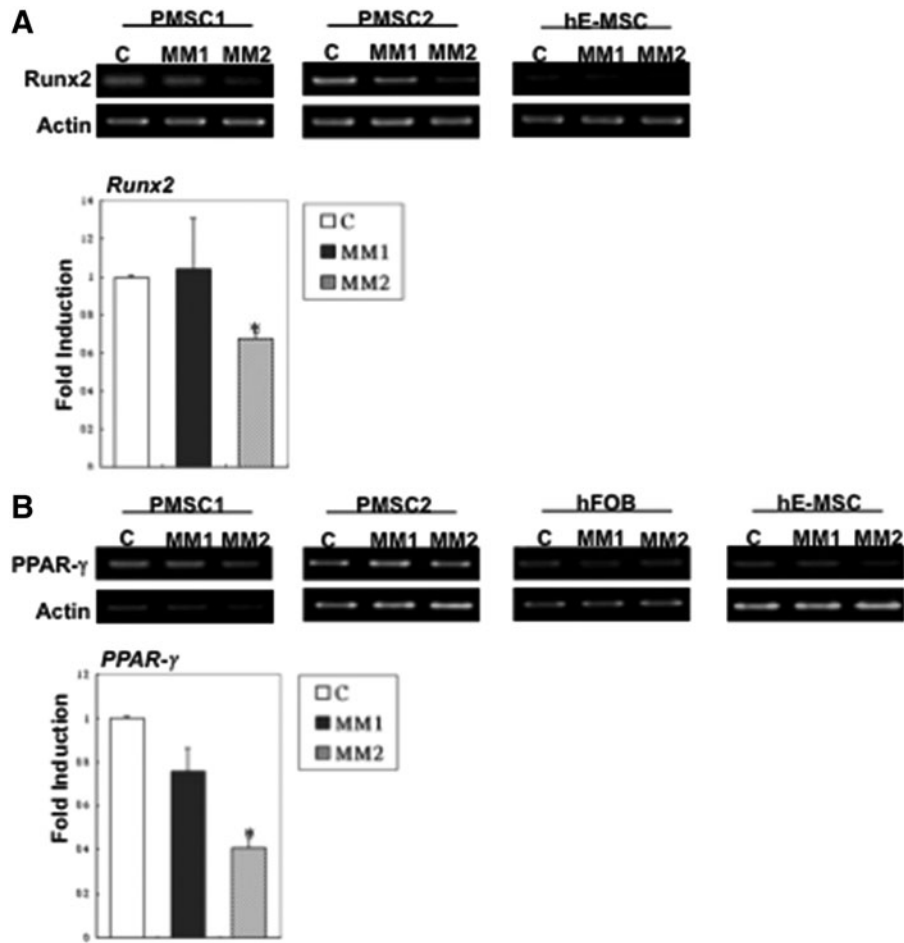

**SUPPLEMENTARY FIG. S4.** SkM differentiation of hDE-MSCs with MM2 was associated with significant suppression of the non-muscle lineage master transcription factors *Runx2* and *PPAR- $\gamma$* . Gene expression of (A) *Runx2*, the master transcription factor for osteogenic differentiation and (B) *PPAR- $\gamma$* , the master transcription factor for adipogenic differentiation as assessed by RT-PCR with quantification in hDE-MSCs (two donors of PMSCs and hE-MSCs) after culturing in (C, control; hDE-MSCs maintain in growth medium), MM1 and MM2 for 7 days.
