# Supplementary material
Source: PubMed Central journal article supplement (PMC4027989)
Supplement: Supp_Figure5.pdf [file Supp_Figure5.pdf]

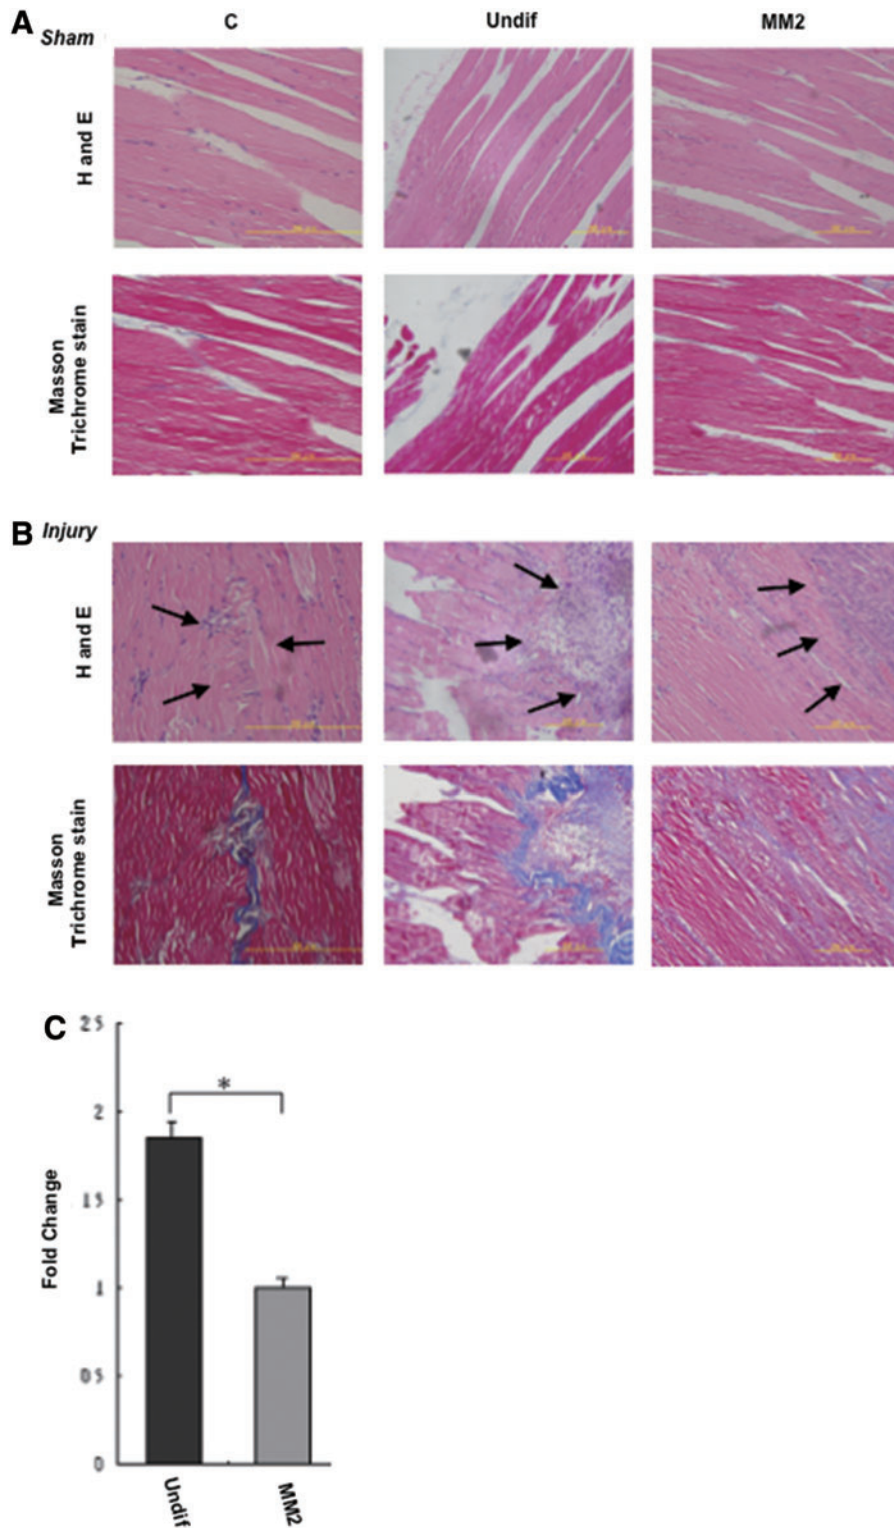

**SUPPLEMENTARY FIG. S5.** Reduction of fiber necrosis by SkM-differentiated hDE-MSCs in an in vivo model of SkM injury. Hematoxylin and eosin and Masson Trichrome staining of SkM tissue paraffin sections from (A) sham, normal saline-injured (sham), and (B) bupivacaine hydrochloride-injured (injury) mice (three per group) after local injection of phosphate-buffered saline only (C, control), undifferentiated PMSCs (Undif), or MM2-cultured PMSCs (MM2). Magnification, 200 $\times$ . (C) Quantification of area of fiber necrotic damage (*black arrows*) in bupivacaine-injured mice after injection of hDE-MSCs. Quantification was performed by analysis of 12 sections per mouse, with 600–1,000 nuclei counted per section. \* $P < 0.05$ , undifferentiated hDE-MSCs compared to MM2-cultured hDE-MSCs injection.
